# Supplementary material for: Physical and chemical model of ion stability and movement within the dynamic and voltage-gated STM tip–surface tunneling junction
Source: Royal Society of Chemistry journal article supplement (doi:10.1039/c7fd00104e), 2017-01-01
Supplement: c7fd00104e1.pdf [file c7fd00104e1.pdf]

# Supporting Information

## **Physical and chemical model of ion stability and movement within the dynamic and voltage-gated STM tip-surface tunneling junction**

Brandon E. Hirsch, Kevin McDonald, Steven L. Tait, Amar H. Flood

Department of Chemistry, Indiana University, 800 E. Kirkwood Avenue, Bloomington, IN 47405 (USA)

Email of corresponding authors: [taite@indiana.edu](mailto:taite@indiana.edu), [aflood@indiana.edu](mailto:aflood@indiana.edu)

- S1. van der Waals forces of the surface
- S2. Electrostatic forces of the surface
- S3. van der Waals forces of the tip
- S4. Electrostatic forces of the tip
- S5. Density functional theory calculation
- S6. Array of 25 molecules with the anion
- S7. van der Waals forces of the molecule
- S8. Electrostatics of the molecule
- S9. Electric field between the tip and surface
- S10. 2D contour plots
- S11.  $\alpha$  Phase assembly of ATO-C<sub>12</sub>
- S12. ATO-C<sub>12</sub>  $\alpha$  phase with no anions
- S13. Line profiles of tip retractions
- S14. ATO-C<sub>12</sub>  $\alpha$  phase with bias switching with no anions
- S15. Energy-distance plots

## S1. van der Waals forces of the surface

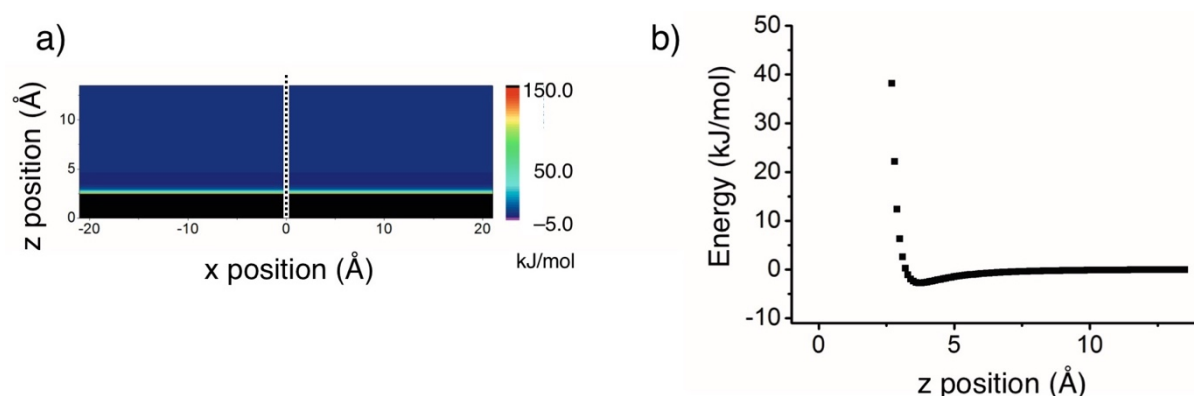

**Figure S1.** a) 2D contour plot of the modelled vdW forces between the bromide anion and the surface of graphite that was modelled as a semi-infinite plane. b) Potential energy plotted as a function of  $z$  position at the position  $x = 0.0 \text{ Å}$  (shown in a) as a dotted line), which is the position of the anion binding pocket in the molecular receptor.

The vdW interactions with the HOPG surface were calculated based on a point interacting with a semi-infinite plane.<sup>1</sup> The energy is dependent on ( $z$ ) the position of the anion above the surface:

$$V(z) = 4\epsilon \left( \frac{\sigma^{12}}{z^{12}} - \frac{2\pi\rho\sigma^6}{12z^3} \right)$$

with  $\epsilon$  and  $\sigma$  values of  $0.382 \text{ kJ / mol}$  and  $3.6 \text{ Å}$ , respectively. The density of atoms in the surface  $\rho$  was set to  $0.114 \text{ Å}^{-3}$  based on the unit cell measurements for the HOPG surface.

## S2. Electrostatic forces of the surface

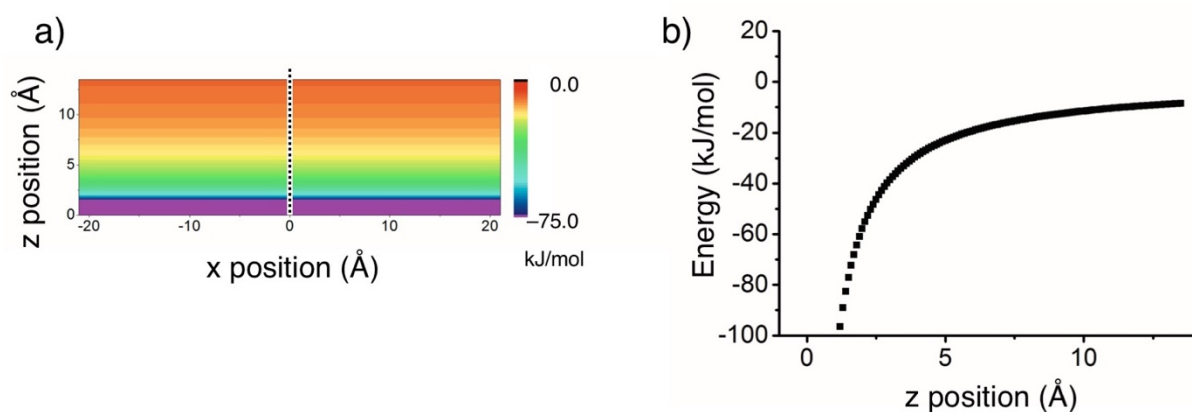

**Figure S2.** a) 2D contour plot of the modelled ES forces between the bromide anion and the surface of graphite that was modelled as an infinite plane. b) Plot of potential energy as a function of  $z$  position at  $x = 0.0$  Å, as shown in a) using a dotted line.

The image charge model, was used to describe electrostatic interaction in this case of a bromide anion near the surface of HOPG. This interaction was calculated using the equation below:<sup>2</sup>

$$V(z) = c \frac{q^2}{4\pi\epsilon_0\epsilon \cdot 2z}$$

with a scaling factor  $c$  taken as 0.95 to represent 95% the original Coulombic interaction in graphite<sup>3</sup> and  $q$  as the charge of the anion.

### S3. van der Waals forces of the tip

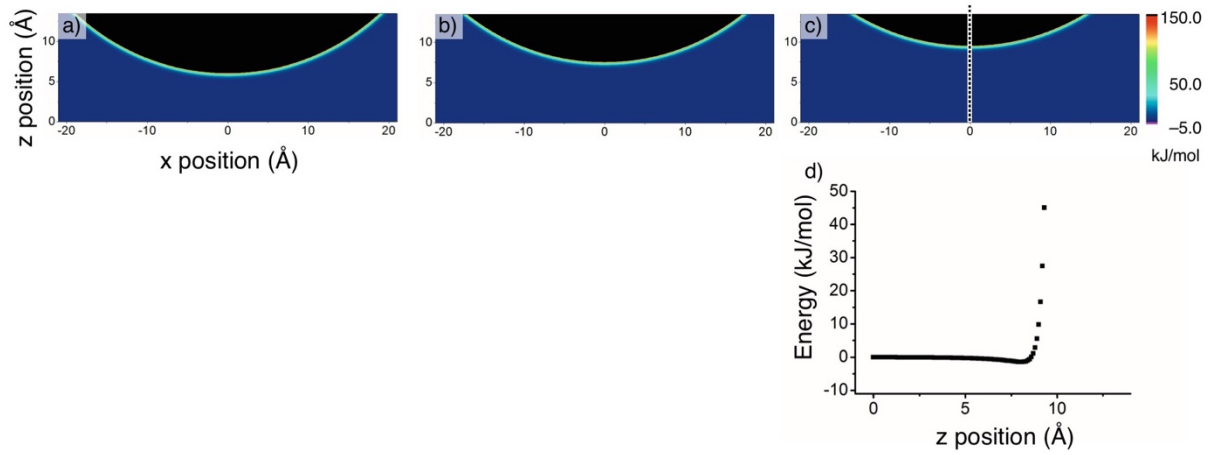

**Figure S3.** 2D contour plots of the modelled vdW forces between the bromide anion and the spherical tip. Three tip positions, a)  $z = 8.5$  Å, b)  $z = 10.0$  Å, c)  $z = 12.0$  Å, are shown. d) Plot of potential energy as a function of  $z$  position at  $x = 0.0$  Å, with a tip height  $z_{tip} = 12.0$  Å as shown in c) using a dotted line.

The vdW interactions of the anion with the tip, modelled as a sphere of  $r_{tip} = 25$  Å, were calculated based on a particle-sphere form of the Lennard-Jones (LJ) potential:<sup>1</sup>

$$V(d) = 4\epsilon \left( \frac{\sigma^{12}}{d^{12}} - \frac{4}{3} \frac{r_{tip}^3 \pi \sigma^6 \rho}{(d + 2r_{tip})^3 d^3} \right)$$

where  $d$  is the distance between the anion and the surface of the tip and  $\epsilon$  and  $\sigma$  are vdW parameters with values of 0.41 kJ/mol and 3.6 Å, respectively. The density of atoms in the tip  $\rho$  was calculated to be  $0.083$  Å<sup>-3</sup> based on unit cell measurements for Pt metal.

## S4. Electrostatic forces of the tip

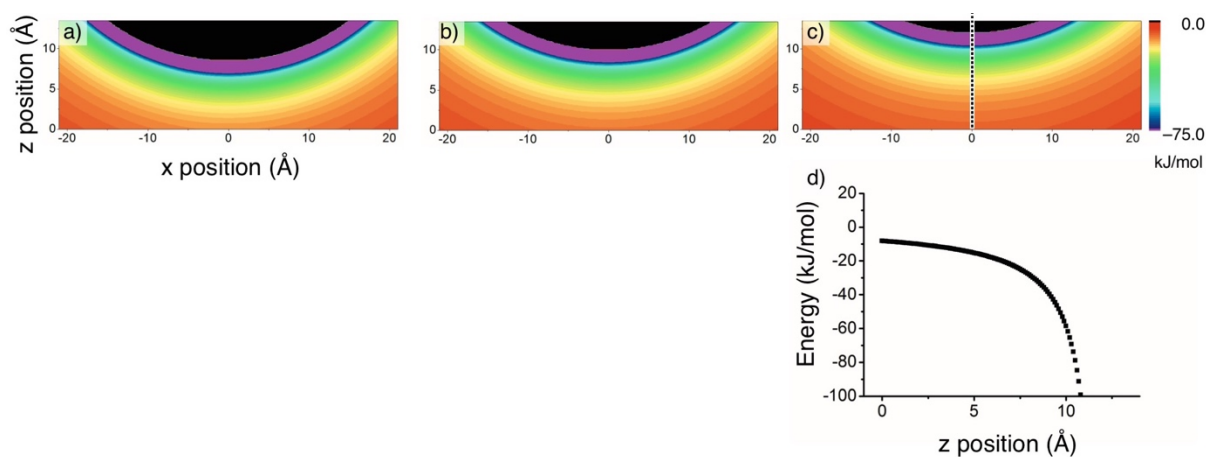

**Figure S4.** 2D contour plots of the modelled ES forces between the bromide anion and the spherical tip. Three tip positions, a)  $z = 8.5$  Å, b)  $z = 10.0$  Å, c)  $z = 12.0$  Å, are shown. d) Plot of potential energy as a function of  $z$  position at  $x = 0.0$  Å, with a tip height  $z_{tip} = 12.0$  Å as shown in c) using a dotted line.

An image charge model was used to describe the anions interaction with the tip modelled as a sphere of  $r_{tip}$  (25 Å). This interaction was calculated using the equation below:<sup>2</sup>

$$V(z, r) = \frac{q^2 r_{tip}}{4\pi\epsilon_0 \epsilon \cdot 2(r^2 - r_{tip}^2)}$$

Where  $r$  is the distance from the anion to the center of the tip and  $q$  is the charge on the anion.

## S5. Density functional theory calculation

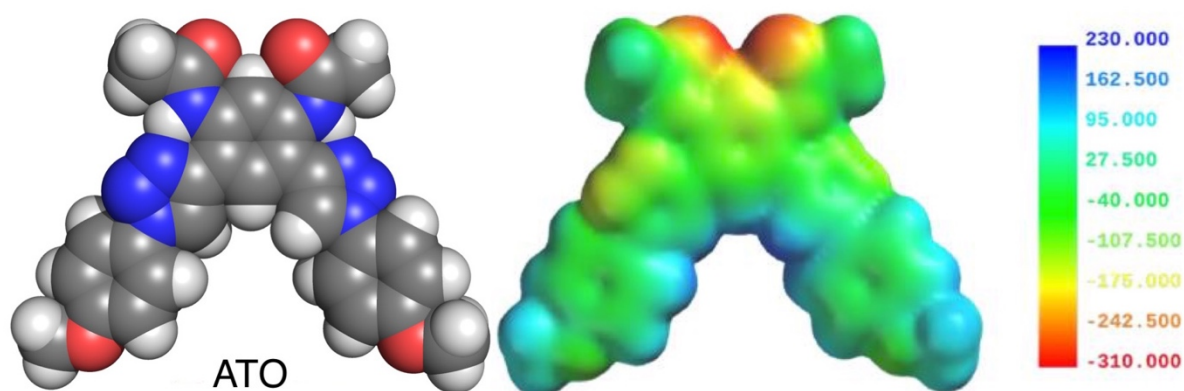

**Figure S5.** Geometry optimized structure (B3LYP/6-31G\*) calculated with pentanoic acid solvent and electrostatic potential surface (ESP, B3LYP/6-31G\*) for aryl-triazole oligomer (ATO) receptor with methyl truncation. The values for the ESP surfaces range from  $-310$  (red) to  $+230$  (blue) kJ / mol.

The geometry-optimized structures of anion receptor were determined using density functional theory (DFT) at the B3LYP/6-31G\* level of theory with a pentanoic acid solvation model. Pentanoic acid was chosen because an octanoic acid solvent model was not available. It is, however, similar to octanoic acid; both are carboxylic acids and have similar dielectric constants of 3.3 and 2.8, respectively. The alkyl chains (both pentyl and C<sub>12</sub>) were truncated to methyls for simplicity of the calculation.

### S6. Array of 25 molecules with the anion

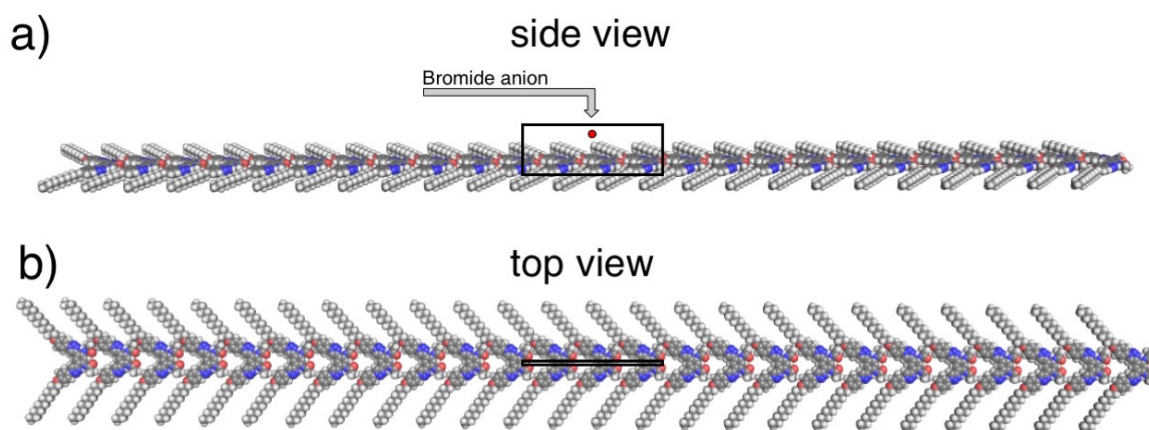

**Figure S6.** Schematic illustration of the modelled area viewed from the side a) and from the top b) of the interaction between the bromide anion with a row of twenty-five receptors by moving the anion along the  $xz$ -plane represented. An array of 25 molecules was used to minimize local variation in the potential energy of the surface due to molecular dipole moments of neighboring molecules, i.e., the local dipole potential with 25 molecules was relatively flat in the region studied.

### S7. van der Waals of the molecule

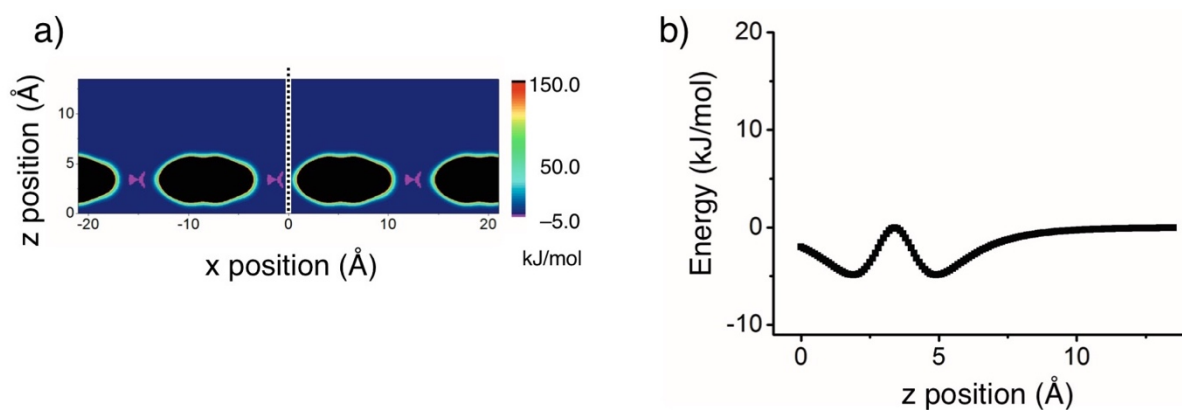

**Figure S7.** a) 2D contour plot of the modelled vdW forces between the bromide anion and the physisorbed ATO receptor molecules. b) Plot of potential energy as a function of  $z$  position at  $x = 0.0$  Å, as shown with a dotted line in a). The vdW interaction between anion and molecular receptor was calculated pairwise using a Lennard-Jones 6-12 potential using atomic coordinates for each of 25 receptor molecules on the surface.



## S8. Electrostatics of the molecule

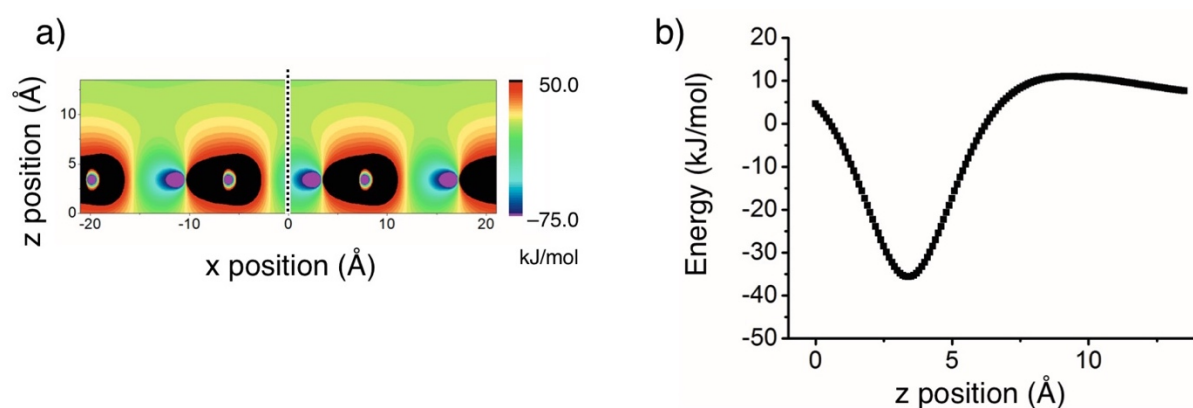

**Figure S8.** a) 2D contour plot of the modelled ES forces between the bromide anion and the physisorbed ATO receptor molecules. b) Plot of potential energy as a function of  $z$  position at  $x = 0.0$  Å, as shown with a dotted line in a). The ES interaction between anion and molecular receptor was calculated pairwise using atomic coordinates and partial charges for each of 25 receptor molecules on the surface.

## S9. Electric field between the tip and surface

To compute the electric field due to the STM bias, and in turn the potential energy of the anion within the field, the method of images was used for a charged sphere electrode near a conductive surface.<sup>4</sup> The potential energy felt by the anion, treated as a single negative point charge, at an arbitrary position between the tip (modeled as a sphere with radius 25 Å) and a semi-infinite plane is given by

$$\phi(r, z) = aV \sum_{i=0}^{\infty} \frac{\xi_i}{[(z - z_i)^2 + r^2]^{1/2}} - \frac{\xi_i}{[(z + z_i)^2 + r^2]^{1/2}}$$

where the potential  $\phi(r, z)$  is found by a summing the image charges ( $\xi_i$ ) at a particular bias  $V$  between the two objects. The 2D contour plots shown below demonstrate that the negatively charged bromide anion would migrate toward the surface when the surface is positively biased (Figure S9a-b, g). Alternatively at negative surface biases the anion will migrate toward the tip (Figure S9c-f, h).

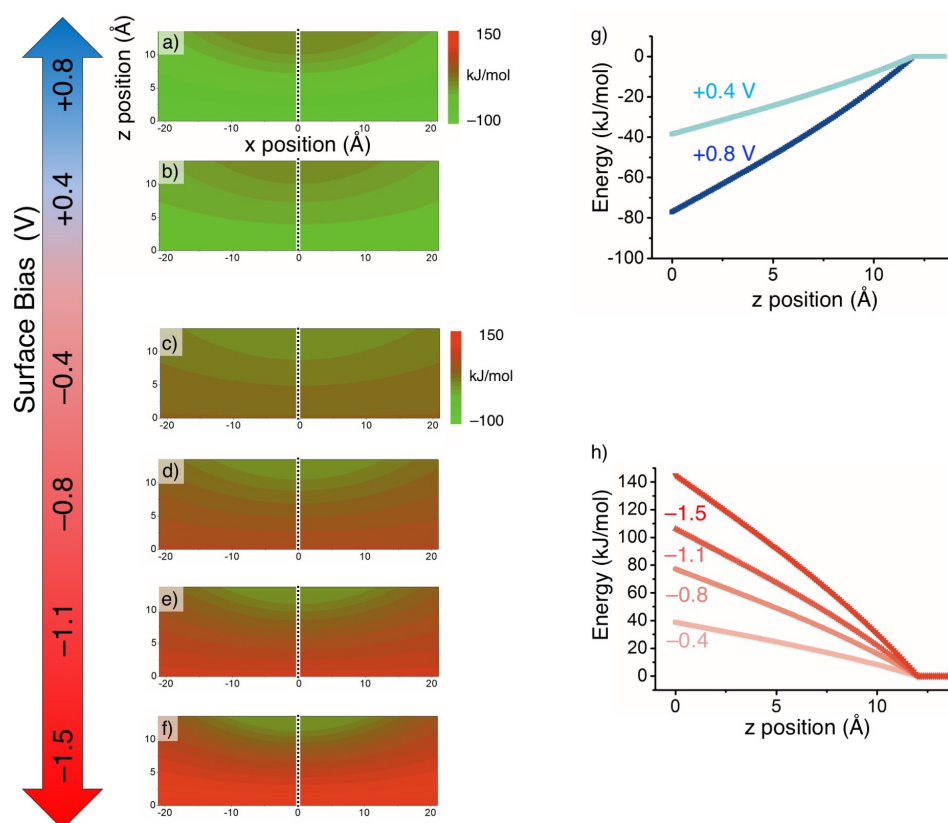

**Figure S9.** a-f) 2D contour plots series of the modelled interaction between the bromide anion and the electric field generated between the tip ( $z = 12.0$  Å) and surface. The modelled surface biases are a)  $V_b = +0.8$  V, b)  $V_b = +0.4$  V, c)  $V_b = -0.4$  V, d)  $V_b = -0.8$  V, e)  $V_b = -1.1$  V, and f)  $V_b = -1.5$  V. g) z-energy (kJ / mol) plot at the position  $x = 0.0$  Å for the  $V_b = +0.8$  V (deep blue) and  $V_b = +0.4$  V (light blue). h) z-energy (kJ / mol) plot at the position  $x = 0.0$  Å for the  $V_b = -0.4$  V,  $-0.8$  V,  $-1.1$  V,  $-1.5$  V in shades or red.

### S10. Phase 2D contour plots

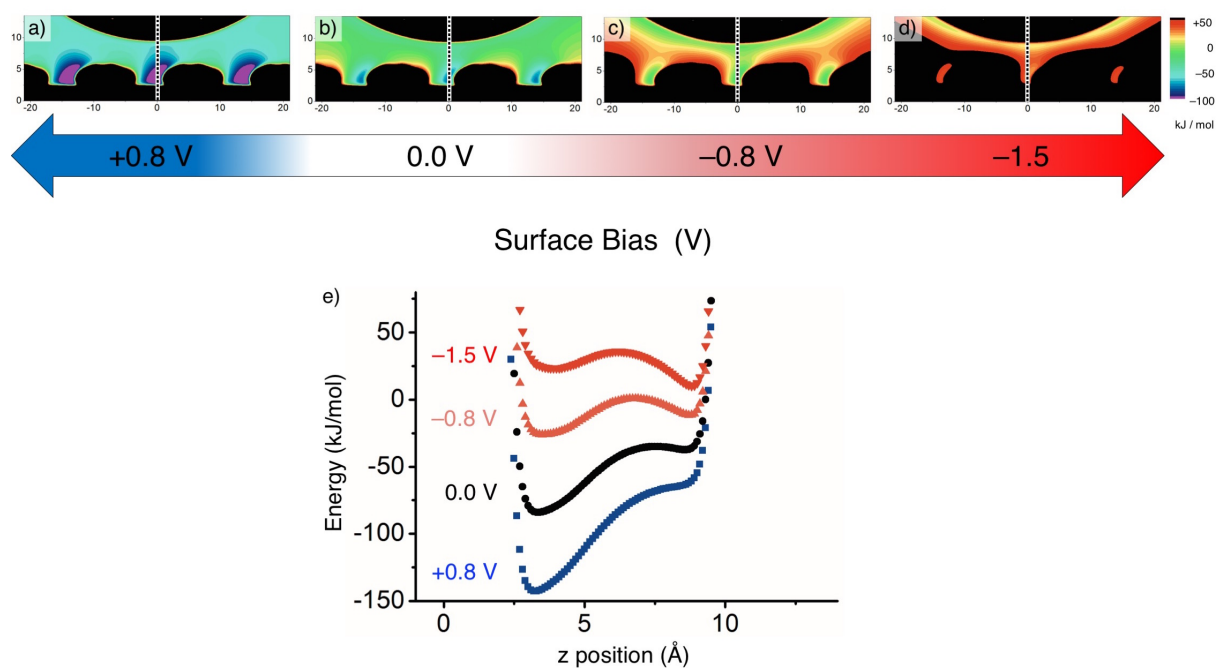

**Figure S10.** a-d) 2D contour plots series of the total interaction of the bromide anion in the tip-surface tunneling junction with the tip at  $z = 12.0$  Å. The modelled surface biases are a)  $V_b = +0.8$  V, b)  $V_b = 0.0$  V, c)  $V_b = -0.8$  V, and d)  $V_b = -1.5$  V. e)  $z$ -energy (kJ / mol) plot at the position  $x = 0.0$  Å for the all the surface biases plotted in a-d. Notice the drastic destabilization of the surface bound state at  $x = 3.4$  Å when compared to the state that exists at the tip,  $x = 9.5$  Å.

# **S11. $\alpha$ Phase assembly of ATO-C<sub>12</sub>**

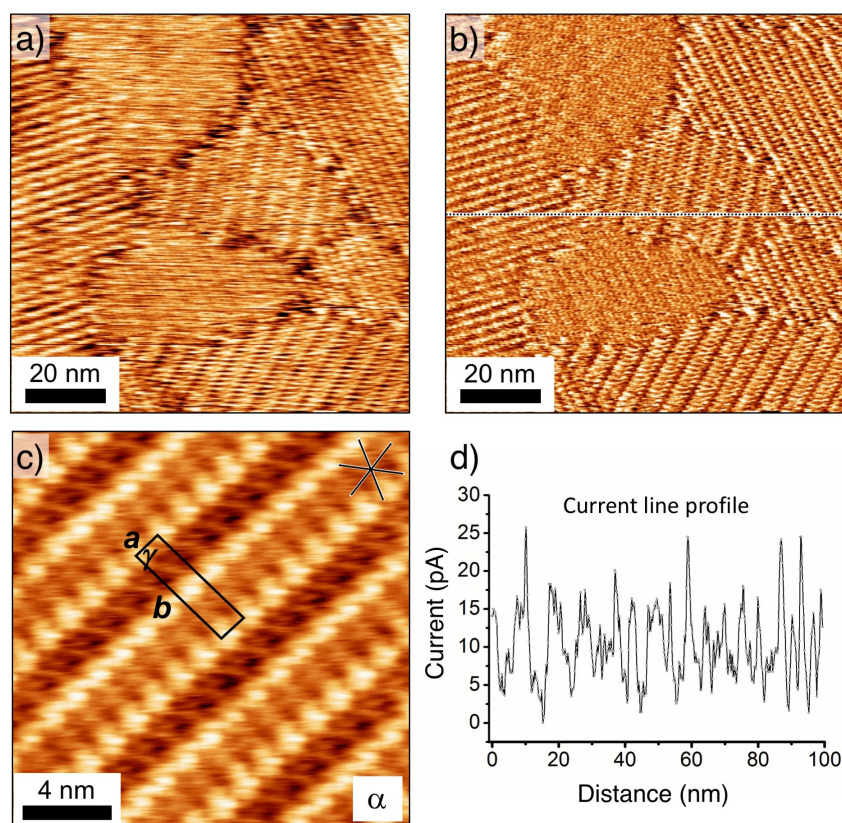

**Figure S11.** a) STM topography and b) current image the  $\alpha$  phase assembly of ATO-C<sub>12</sub> at the octanoic acid/graphite interface  $[\text{ATO-C}_{12}] = 1.0 \times 10^{-4} \text{ M}^{-1}$ . c) High-resolution STM image of the  $\alpha$  phase assembly of ATO-C<sub>12</sub>. Unit cell dimensions are  $a = 1.38 \pm 0.12 \text{ nm}$ ,  $b = 5.35 \pm 0.21 \text{ nm}$ , and  $\gamma = 89.0 \pm 0.3^\circ$ . Images were recorded at the octanoic acid/HOPG interface. ( $T = 23 \pm 0.2^\circ \text{C}$ ,  $I_t = 100 \text{ pA}$ ,  $V_b = -0.7 \text{ V}$ ). d) Line profile from the current image that appears in b). The current setpoint of 100 pA has already been subtracted off. The deviations 10–30 pA observed were observed as standard fluctuations for the free receptor.

**S12. ATO-C<sub>12</sub>  $\alpha$  phase with no anions**

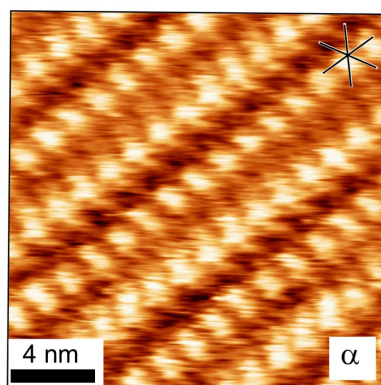

**Figure S12.** High-resolution STM image of the  $\alpha$  phase assembly of ATO-C<sub>12</sub> with a one-equivalent addition of the TBABr salt. No evidence of anion binding inside the ATO-C<sub>12</sub> binding core could be observed. Image was recorded at the octanoic acid/HOPG interface. ( $T = 23 \pm 0.2$  °C,  $I_t = 100$  pA,  $V_b = -0.432$  V).

### S13. Line profiles of tip retractions

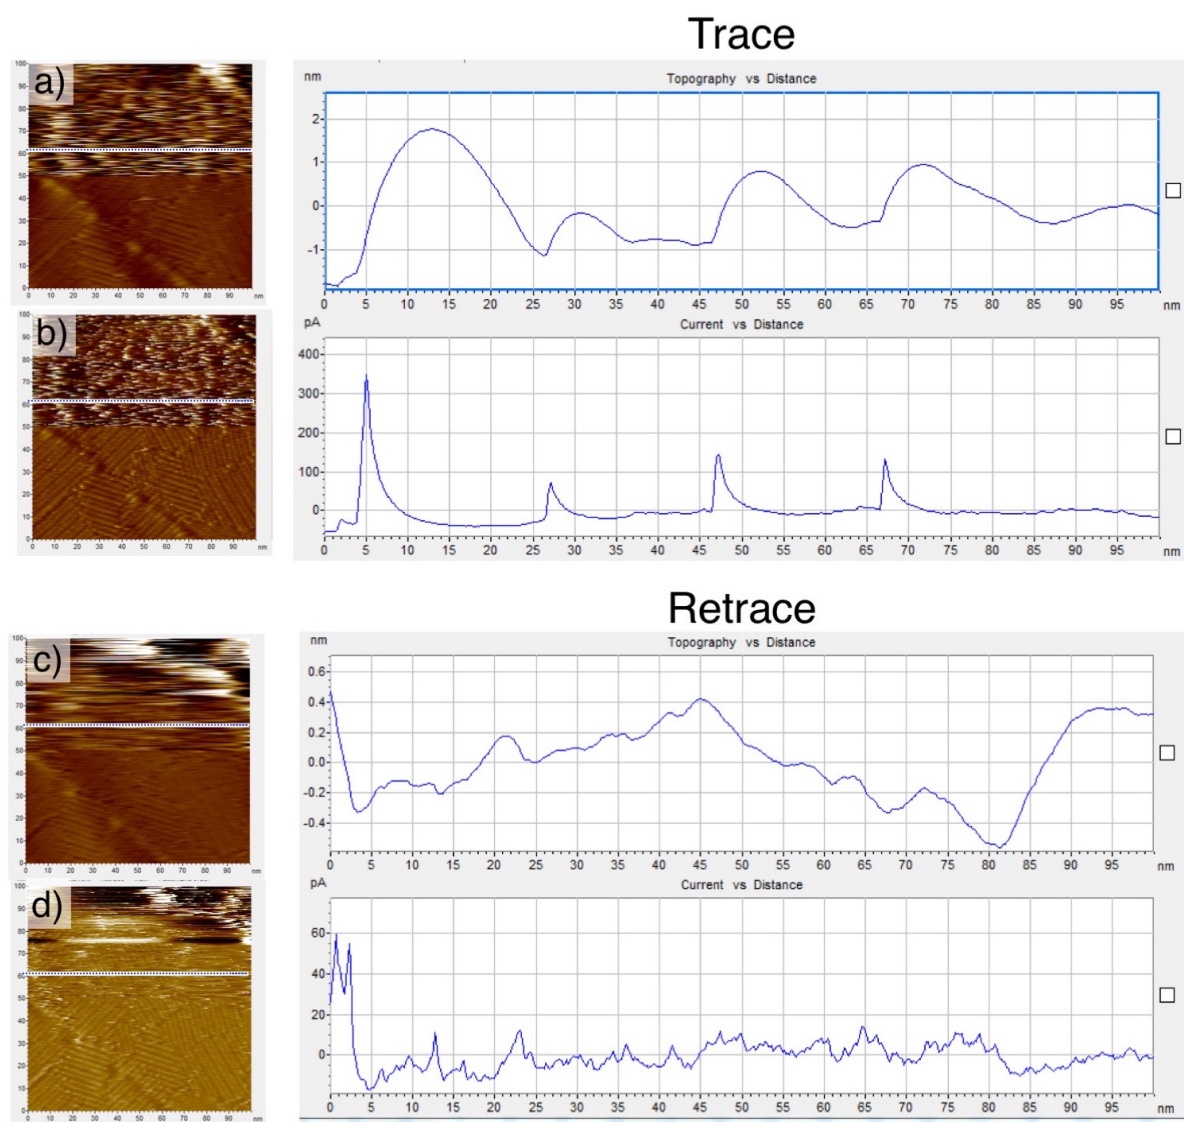

**Figure S13.** STM image comparison between the a) topography trace, b) current trace, c) topography retrace, and d) current trace for the self-assembly of ATO-C<sub>12</sub> with one equivalent of TBABr added. Image was collected at the octanoic acid/HOPG interface. The bias was changed from  $V_b = -0.432$  V at the top of the image to  $V_b = -0.832$  V at the bottom of the image. Tunneling current was held consistent at  $I_t = 100$  pA. Differences in the trace and retrace current images reveal asymmetry effects are likely involved in the tip anion ejection.



**S14. ATO-C<sub>12</sub>  $\alpha$  phase with bias switching with no anions**

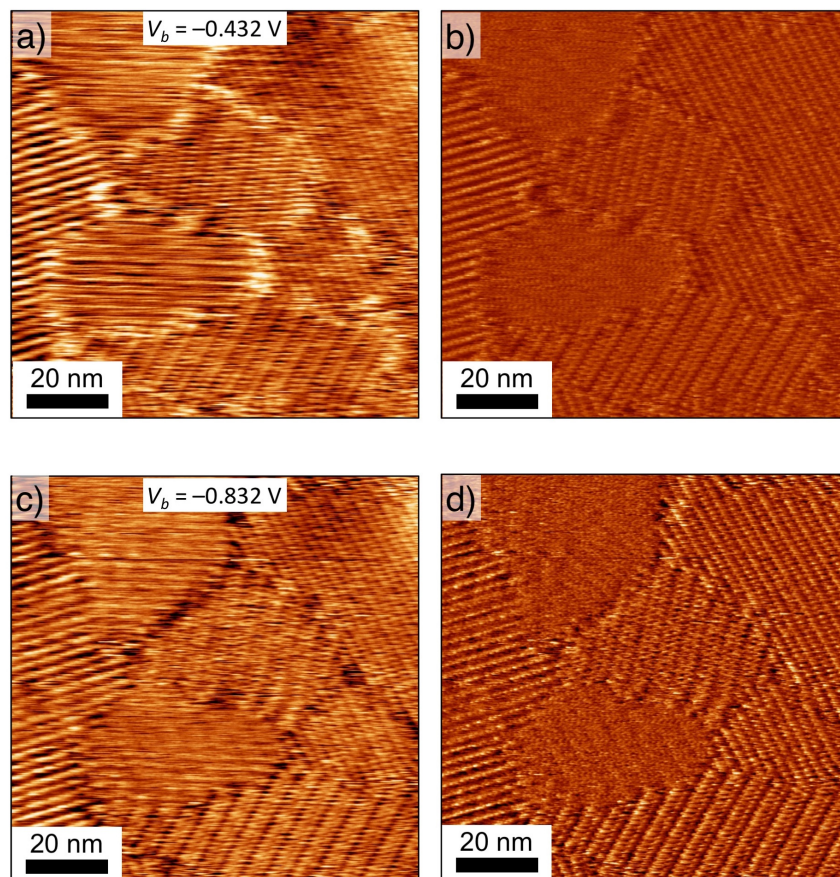

**Figure S14.** STM image comparison of the a) topography and b) current images of ATO-C<sub>12</sub> when imaged at low bias  $V_b = -0.432$  V at the octanoic acid/graphite interface. Similar resolution is also received in the c) topography and d) current images with larger negative surface biases  $V_b = -0.832$  V. This demonstrates that the bias dependent clarity observed in when anions are added (Figures 5 and S13) is not the result of a change in the local density of states.

## S15. Energy-distance plots

a)

$$V_b = -0.8 \text{ V}, z_{\text{tip}} = 8.5 \text{ \AA}$$

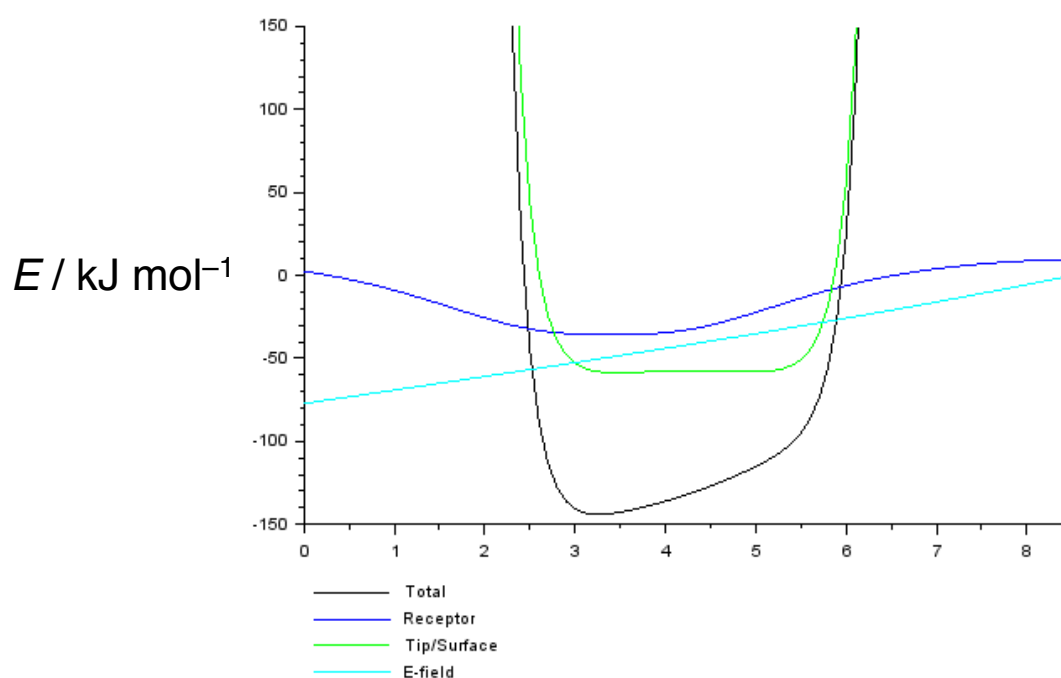

b)

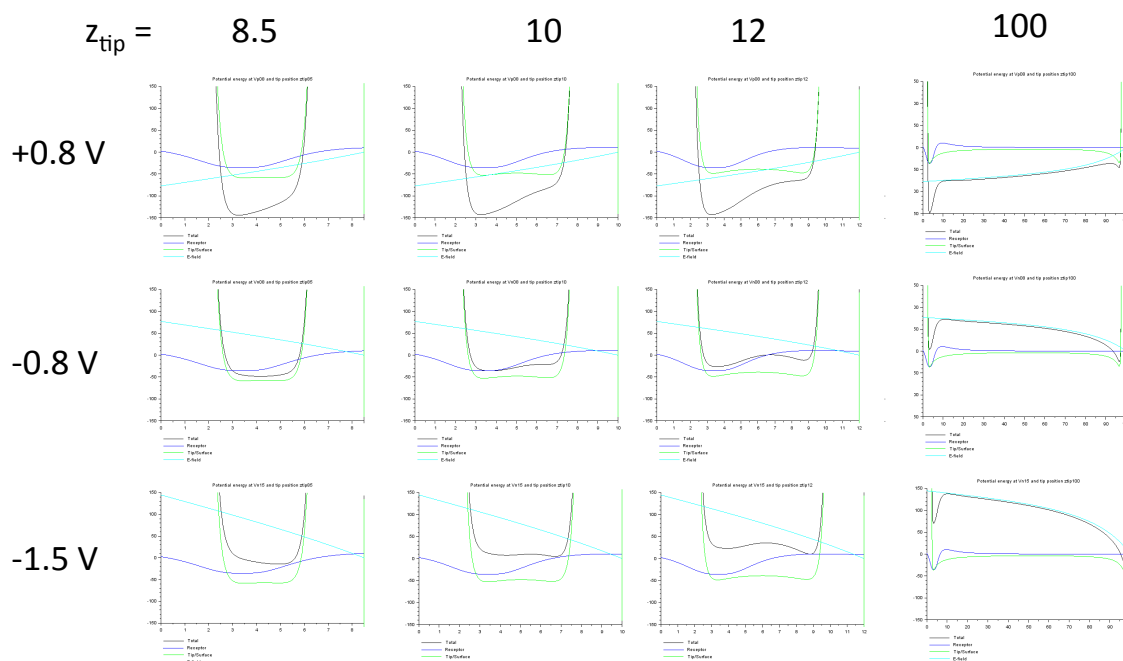

**Figure S15.** Plots of the energy of a bromide anion in the tip-surface junction as a function of bias ( $V_b$ ) and  $z$ -distance between the tip and surface ( $z_{\text{tip}}$ ) at the  $x = 0 \text{ \AA}$  position. a) Representative plot for  $V_b = -0.8 \text{ V}$  and  $z_{\text{tip}} = 8.5 \text{ \AA}$ , and b) a series of plots for various biases and distances.



## **References**

1. Israelachvili, J. N., *Intermolecular and Surface Forces*. 3rd ed.; Academic Press, Elsevier: Amsterdam, 2011.
2. Griffiths, D. J., *Introduction to electrodynamics*. 2nd Ed. ed.; Prentice-Hall, Inc.: Englewood Cliffs, New Jersey, 1989; p 124-125.
3. Jiang; Krauss, T. D.; Brus, L. E., *J. Phys. Chem. B* 2000, **104**, 11936-11941.
4. Dall'Agnol, F. F.; Mammanna, V. P. *Revista Brasileira de Ensino de Física* 2009, **31**, 3503.1-3503.9.
